# Supplementary material for: Perfluoroalkyl Chemicals and Asthma among Children 12–19 Years of Age: NHANES (1999–2008)
Source: PubMed Central journal article supplement (PMC4181915; doi:10.1289/ehp.1306606), 2014-06-06
Supplement: ehp.1306606.s001.508.pdf [file ehp.1306606.s001.508.pdf]

## Supplemental Material

### **Perfluoroalkyl Chemicals and Asthma among Children 12–19 Years of Age: NHANES (1999–2008)**

Olivier Humblet, Ledif Grisell Diaz-Ramirez, John R. Balmes, Susan M. Pinney, and Robert A. Hiatt

| <b>Table of Contents</b>                                                                                                                                                                                      | <b>Page</b> |
|---------------------------------------------------------------------------------------------------------------------------------------------------------------------------------------------------------------|-------------|
| <b>Figure S1.</b> Predicted probabilities of ‘Ever Asthma’, ‘Wheeze in Past Year’, and ‘Current Asthma’ by ln-transformed serum PFOA concentration                                                            | 2           |
| <b>Figure S2.</b> Predicted Probabilities of ‘Ever Asthma’, ‘Wheeze in Past Year’, and ‘Current Asthma’ by ln-transformed serum PFOS concentration                                                            | 3           |
| <b>Figure S3.</b> Predicted Probabilities of ‘Ever Asthma’, ‘Wheeze in Past Year’, and ‘Current Asthma’ by ln-transformed serum PFNA concentration                                                            | 4           |
| <b>Figure S4.</b> Predicted Probabilities of ‘Ever Asthma’, ‘Wheeze in Past Year’, and ‘Current Asthma’ by ln-transformed serum PFHxS concentration                                                           | 5           |
| <b>Table S1.</b> Odds Ratios, after incorporating NHANES survey weights, of ‘Ever Asthma’, ‘Wheeze in Past Year’, and ‘Current Asthma’ for a doubling of serum PFC concentrations among children ages 12-19   | 6           |
| <b>Table S2.</b> Odds Ratios, after multiple imputation of missing values, of ‘Ever Asthma’, ‘Wheeze in Past Year’, and ‘Current Asthma’ for a doubling of serum PFC concentrations among children ages 12-19 | 7           |
| <b>Table S3.</b> Odds Ratios of ‘Ever Asthma’, ‘Wheeze in Past Year’, and ‘Current Asthma’ for values above the limit of detection of EPAH, MPAH, PFDE, and PFSA among children ages 12-19                    | 8           |
| <b>Reference</b>                                                                                                                                                                                              | 9           |

**Figure S1.** Predicted probabilities of ‘Ever Asthma’, ‘Wheeze in Past Year’, and ‘Current Asthma’ by ln-transformed serum PFOA concentration. All models adjusted for sex, smoking, age, race/ethnicity, survey cycle, poverty income ratio, and health insurance.

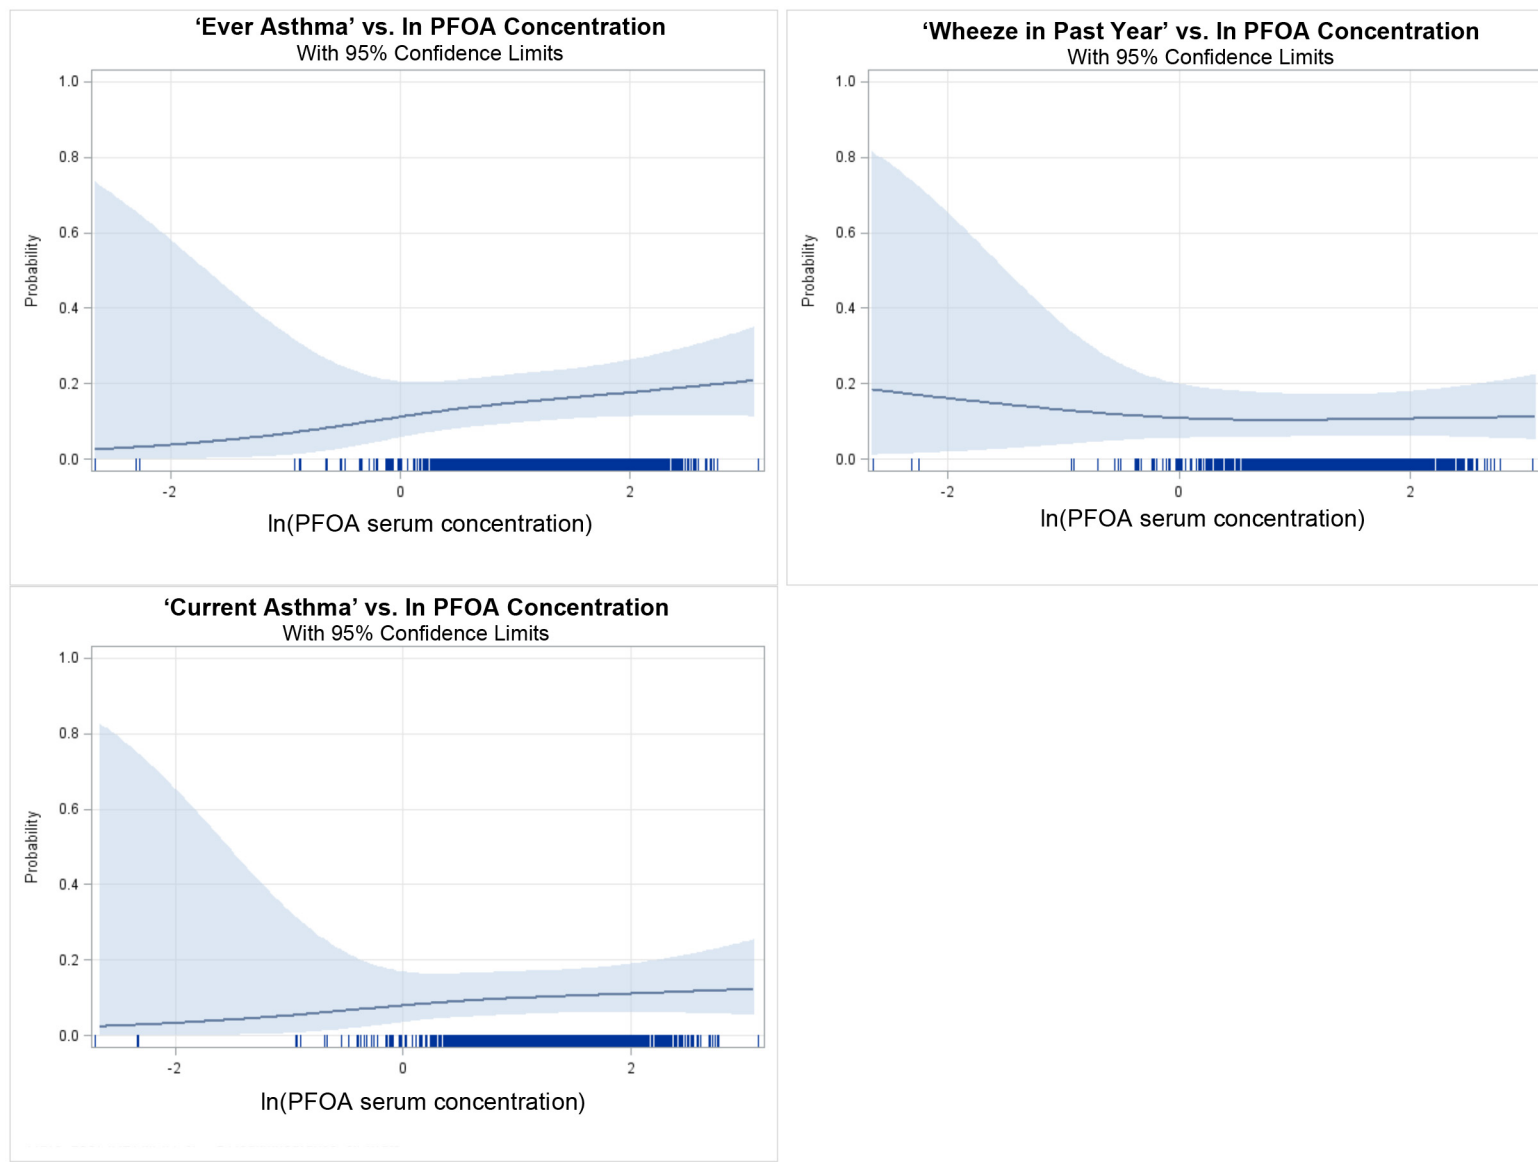

**Figure S2.** Predicted Probabilities of ‘Ever Asthma’, ‘Wheeze in Past Year’, and ‘Current Asthma’ by ln-transformed serum PFOS concentration. All models adjusted for sex, smoking, age, race/ethnicity, survey cycle, poverty income ratio, and health insurance.

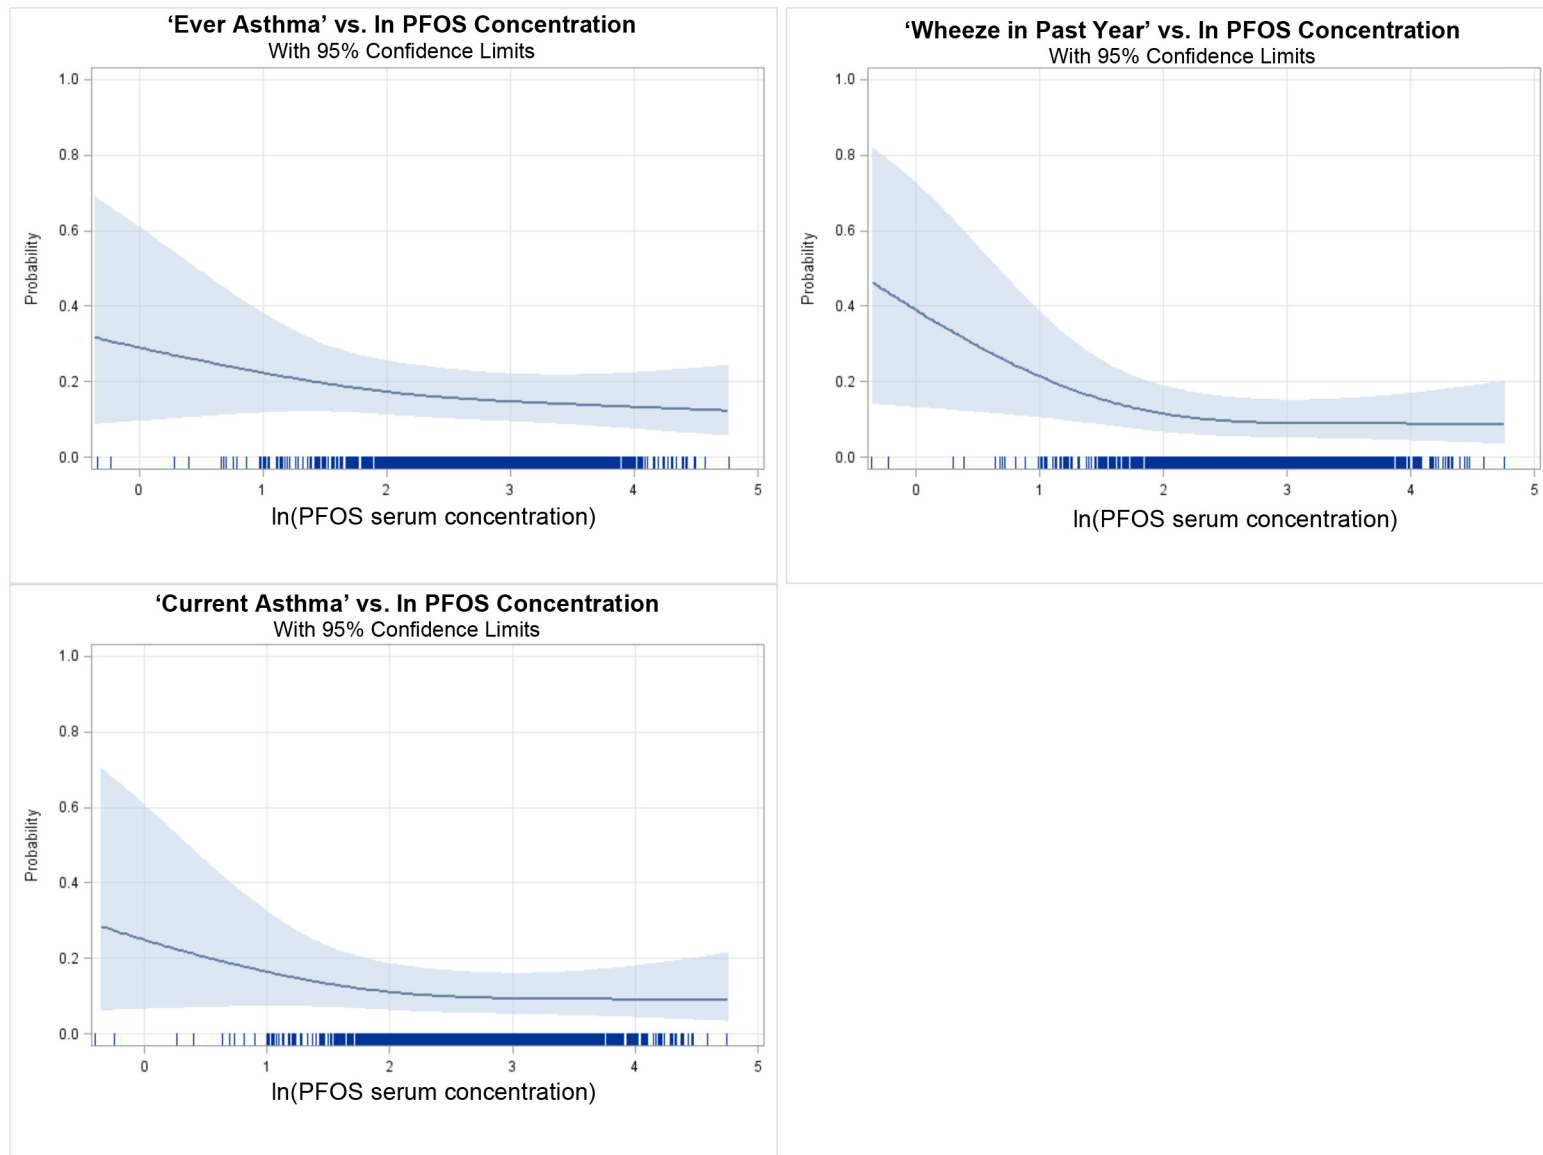

**Figure S3.** Predicted Probabilities of ‘Ever Asthma’, ‘Wheeze in Past Year’, and ‘Current Asthma’ by ln-transformed serum PFNA concentration. All models adjusted for sex, smoking, age, race/ethnicity, survey cycle, poverty income ratio, and health insurance.

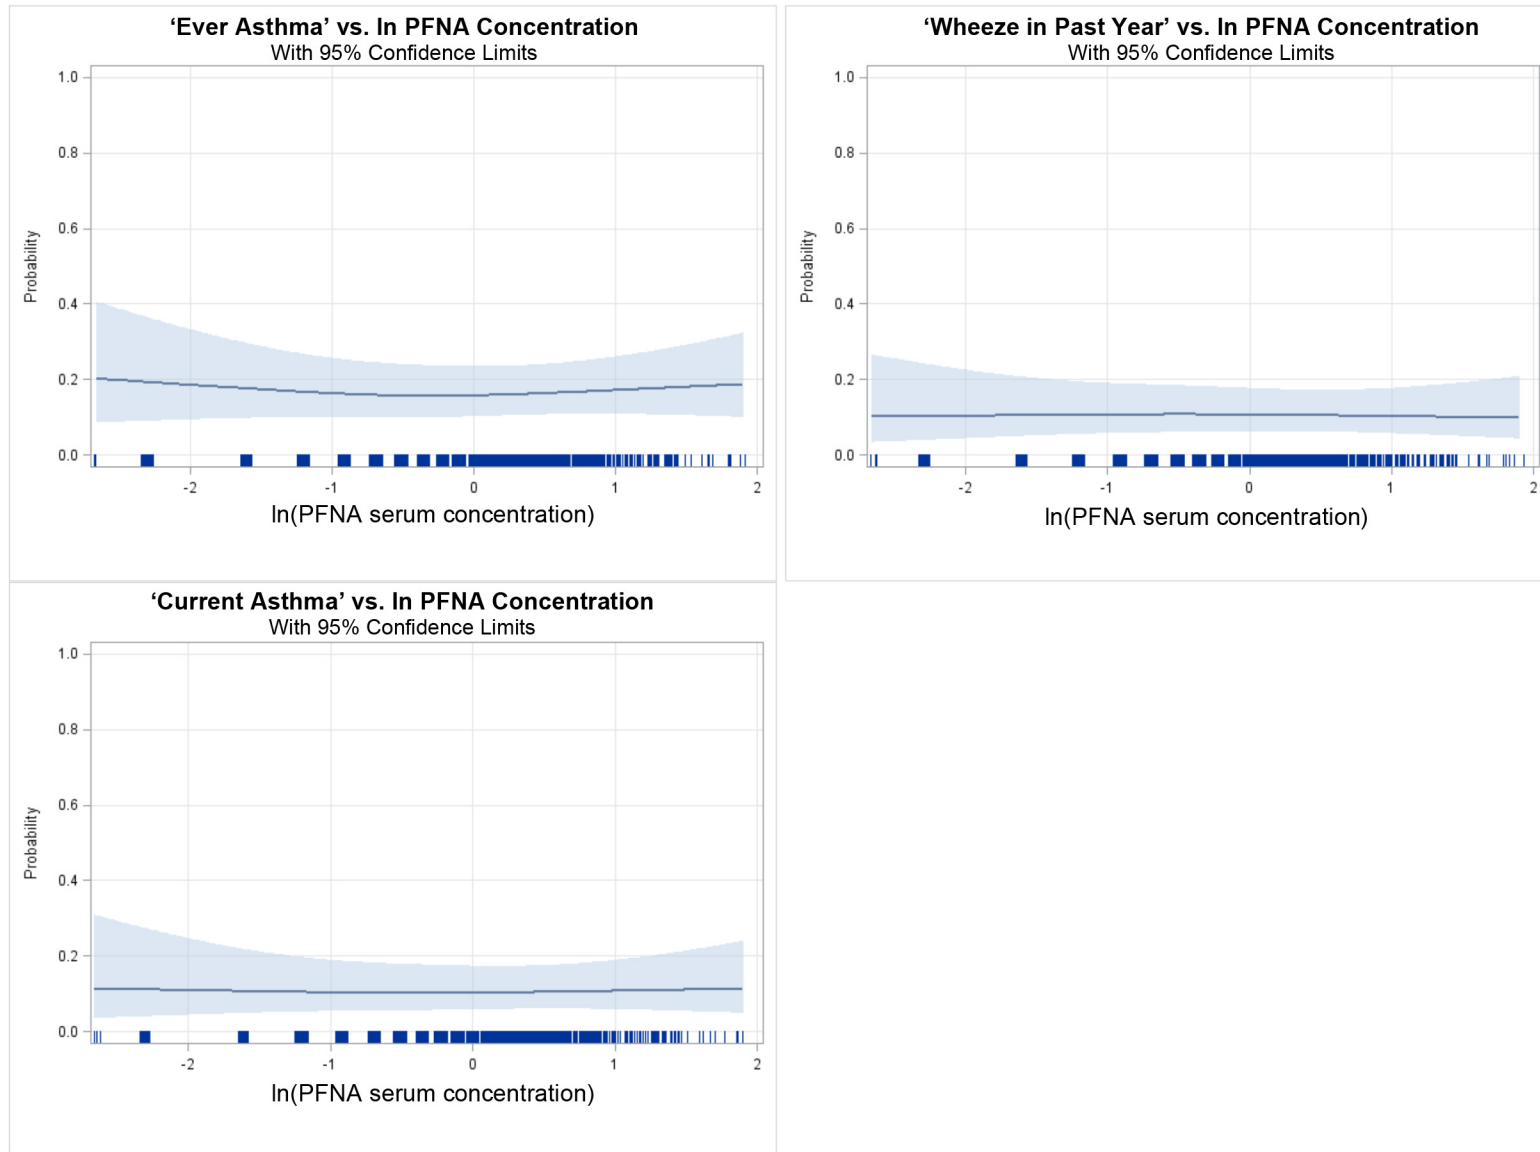

**Figure S4.** Predicted Probabilities of ‘Ever Asthma’, ‘Wheeze in Past Year’, and ‘Current Asthma’ by ln-transformed serum PFHxS concentration. All models adjusted for sex, smoking, age, race/ethnicity, survey cycle, poverty income ratio, and health insurance.

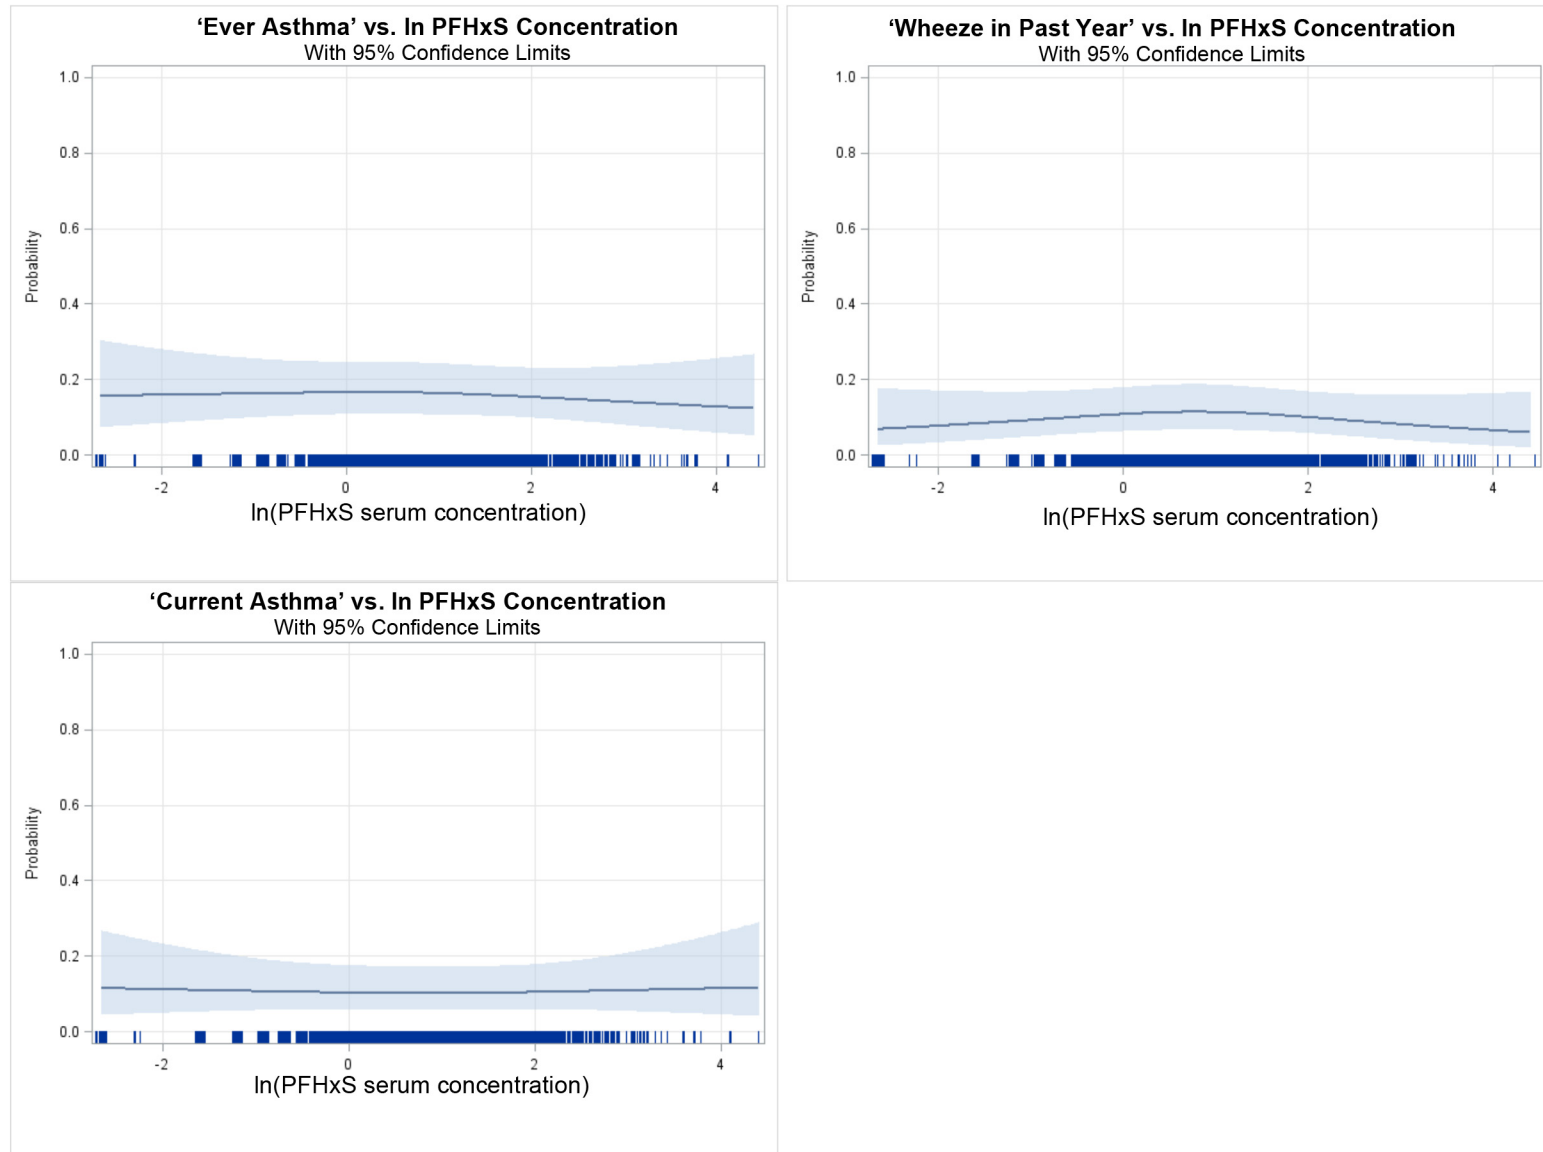

**Table S1.** Odds Ratios, after incorporating NHANES survey weights, of 'Ever Asthma', 'Wheeze in Past Year', and 'Current Asthma' for a doubling of serum PFC concentrations among children ages 12-19 (n = 1,877).

| <b>PFC</b> | <b>Ever Asthma:<br/>OR (CI)</b> | <b>Ever Asthma:<br/>p-value</b> | <b>Wheeze:<br/>OR (CI)</b> | <b>Wheeze:<br/>p-value</b> | <b>Current Asthma:<br/>OR (CI)</b> | <b>Current Asthma:<br/>p-value</b> |
|------------|---------------------------------|---------------------------------|----------------------------|----------------------------|------------------------------------|------------------------------------|
| PFOA       | 1.11 (0.87, 1.42)               | 0.42                            | 1.14 (0.82, 1.58)          | 0.43                       | 1.15 (0.86, 1.55)                  | 0.35                               |
| PFOS       | 0.84 (0.66, 1.08)               | 0.17                            | 0.87 (0.67, 1.13)          | 0.29                       | 0.91 (0.68, 1.21)                  | 0.51                               |
| PFNA       | 0.99 (0.84, 1.16)               | 0.89                            | 1.03 (0.84, 1.26)          | 0.78                       | 0.99 (0.80, 1.23)                  | 0.95                               |
| PFHS       | 0.92 (0.79, 1.06)               | 0.25                            | 0.92 (0.81, 1.06)          | 0.25                       | 0.95 (0.76, 1.20)                  | 0.67                               |

\*p<0.05. All models adjusted for sex, smoking, age, race/ethnicity, survey cycle, poverty income ratio, and health insurance.

**Table S2.** Odds Ratios, after multiple imputation of missing values, of 'Ever Asthma', 'Wheeze in Past Year', and 'Current Asthma' for a doubling of serum PFC concentrations among children ages 12-19 (n = 2,186).

| <b>PFC</b> | <b>Ever Asthma:<br/>OR (CI)</b> | <b>Ever Asthma:<br/>p-value</b> | <b>Wheeze:<br/>OR (CI)</b> | <b>Wheeze:<br/>p-value</b> | <b>Current Asthma:<br/>OR (CI)</b> | <b>Current Asthma:<br/>p-value</b> |
|------------|---------------------------------|---------------------------------|----------------------------|----------------------------|------------------------------------|------------------------------------|
| PFOA       | 1.13 (0.99, 1.29)               | 0.06                            | 1.01 (0.85, 1.20)          | 0.92                       | 1.06 (0.91, 1.25)                  | 0.45                               |
| PFOS       | 0.86 (0.75, 0.98)               | 0.03                            | 0.87 (0.73, 1.03)          | 0.10                       | 0.89 (0.75, 1.05)                  | 0.17                               |
| PFNA       | 1.01 (0.91, 1.13)               | 0.79                            | 1.01 (0.86, 1.18)          | 0.94                       | 1.03 (0.87, 1.23)                  | 0.71                               |
| PFHS       | 0.99 (0.91, 1.08)               | 0.81                            | 1.00 (0.92, 1.09)          | 0.98                       | 1.02 (0.91, 1.15)                  | 0.73                               |

\*p<0.05. All models adjusted for sex, smoking, age, race/ethnicity, survey cycle, poverty income ratio, and health insurance.

Multiple imputation of missing data (i.e. 10 imputations) were conducted as per Berglund et al, 2010.

**Table S3.** Odds Ratios of 'Ever Asthma', 'Wheeze in Past Year', and 'Current Asthma' for values above the limit of detection of EPAH, MPAH, PFDE, and PFSA among children ages 12-19 (n = 1,877).

| <b>PFC</b> | <b>Ever Asthma:<br/>OR (CI)</b> | <b>Ever Asthma:<br/>p-value</b> | <b>Wheeze:<br/>OR (CI)</b> | <b>Wheeze:<br/>p-value</b> | <b>Current Asthma:<br/>OR (CI)</b> | <b>Current Asthma:<br/>p-value</b> |
|------------|---------------------------------|---------------------------------|----------------------------|----------------------------|------------------------------------|------------------------------------|
| EPAH       | 0.93 (0.65, 1.34)               | 0.70                            | 1.19 (0.75, 1.88)          | 0.46                       | 0.97 (0.58, 1.61)                  | 0.91                               |
| MPAH       | 1.33 (0.65, 2.73)               | 0.44                            | 1.62 (0.61, 4.27)          | 0.33                       | 1.10 (0.37, 3.31)                  | 0.87                               |
| PFDE       | 0.87 (0.60, 1.28)               | 0.49                            | 0.97 (0.62, 1.50)          | 0.89                       | 0.96 (0.59, 1.56)                  | 0.88                               |
| PFSA       | 0.92 (0.68, 1.27)               | 0.63                            | 0.98 (0.64, 1.50)          | 0.94                       | 0.91 (0.63, 1.32)                  | 0.62                               |

All models adjusted for sex, smoking, age, race/ethnicity, survey cycle, poverty income ratio, and health insurance.



## Reference

Berglund PA. 2010. An Introduction to Multiple Imputation of Complex Sample Data using SAS®v9.2. In: SAS Global Forum 2010.
